# Supplementary material for: Silencing of Long Noncoding RNA Nespas Aggravates Microglial Cell Death and Neuroinflammation in Ischemic Stroke
Source: PubMed Central journal article supplement — Stroke. 2019 Jun 7;50(7):1850–8. doi: 10.1161/STROKEAHA.118.023376 (PMC6594728; doi:10.1161/strokeaha.118.023376), 2019-06-07
Supplement: str-50-1850-s002.pdf [file str-50-1850-s002.pdf]

## Change of Authorship Form

(Must be completed and signed by ALL authors)

Please check all that apply

New author(s) have been added (in addition to this form, all new authors must complete the copyright transfer agreement and conflict of interest disclosure.

Change in order of authorship.

An author wishes to remove his/her name. An author's name may only be removed his/her own request and a letter signed by the author should accompany this form

Manuscript Number STROKE/2018/023376R1

Manuscript Title Silencing of lncRNA Nespas aggravates microglial cell death and neuroinflammation in Ischemic Stroke

### Former Authorship

Please list ALL AUTHORS in the same order as the original submission. For more than 12, use an extra sheet.

#### Print Name

Name (1) Yiming Deng  
Name (2) Duanduan Chen  
Name (3) Feng Gao  
Name (4) Bo Jin  
Name (5) Hong Lv  
Name (6) Guojun Zhang

#### Print Name

Name (7) Xuan Sun  
Name (8) Lian Liu  
Name (9) Dapeng Mo  
Name (10) Ning Ma  
Name (11) Ligang Song  
Name (12) Xiaochuan Huo

### New Authorship

All authors must sign below agreeing to the changes in authorship. The authorship order must reflect the authorship order of the manuscript.

|                               |                                |                       |
|-------------------------------|--------------------------------|-----------------------|
| Name (1) <u>Yiming Deng</u>   | Signature <u>Yiming Deng</u>   | Date <u>2019.3.21</u> |
| Name (2) <u>Duanduan Chen</u> | Signature <u>Duanduan Chen</u> | Date <u>2019.3.21</u> |
| Name (3) <u>Luyao Wang</u>    | Signature <u>Luyao Wang</u>    | Date <u>2019.3.21</u> |
| Name (4) <u>Feng Gao</u>      | Signature <u>Feng Gao</u>      | Date <u>2019.3.21</u> |
| Name (5) <u>Bo Jin</u>        | Signature <u>Bo Jin</u>        | Date <u>2019.3.21</u> |
| Name (6) <u>Hong Lv</u>       | Signature <u>Hong Lv</u>       | Date <u>2019.3.21</u> |
| Name (7) <u>Guojun Zhang</u>  | Signature <u>Guojun Zhang</u>  | Date <u>2019.3.21</u> |
| Name (8) <u>Xuan Sun</u>      | Signature <u>Xuan Sun</u>      | Date <u>2019.3.21</u> |
| Name (9) <u>Lian Liu</u>      | Signature <u>Lian Liu</u>      | Date <u>2019.3.21</u> |
| Name (10) <u>Dapeng Mo</u>    | Signature <u>Dapeng Mo</u>     | Date <u>2019.3.21</u> |
| Name (11) <u>Ning Ma</u>      | Signature <u>Ning Ma</u>       | Date <u>2019.3.21</u> |
| Name (12) <u>Ligang Song</u>  | Signature <u>Ligang Song</u>   | Date <u>2019.3.21</u> |

Please scan and email to [stroke@strokeahajournal.org](mailto:stroke@strokeahajournal.org).

## Change of Authorship Form

(Must be completed and signed by ALL authors)

Please check all that apply

New author(s) have been added (in addition to this form, all new authors must complete the copyright transfer agreement and conflict of interest disclosure.

Change in order of authorship.

An author wishes to remove his/her name. An author's name may only be removed his/her own request and a letter signed by the author should accompany this form

Manuscript Number STROKE/2018/023376R1 \_\_\_\_\_

Manuscript Title Silencing of lncRNA Nespas aggravates microglial cell death and neuroinflammation in Ischemic Stroke

### Former Authorship

Please list ALL AUTHORS in the same order as the original submission. For more than 12, use an extra sheet.

#### Print Name

Name (1) Tianyi Yan  
Name (2) Zhongrong Miao  
Name (3) \_\_\_\_\_  
Name (4) \_\_\_\_\_  
Name (5) \_\_\_\_\_  
Name (6) \_\_\_\_\_

#### Print Name

Name (7) \_\_\_\_\_  
Name (8) \_\_\_\_\_  
Name (9) \_\_\_\_\_  
Name (10) \_\_\_\_\_  
Name (11) \_\_\_\_\_  
Name (12) \_\_\_\_\_

### New Authorship

All authors must sign below agreeing to the changes in authorship. The authorship order must reflect the authorship order of the manuscript.

|                                |                                 |                       |
|--------------------------------|---------------------------------|-----------------------|
| Name (1) <u>Xiaochuan Huo</u>  | Signature <u>Xiaochuan Huo</u>  | Date <u>2019.3.21</u> |
| Name (2) <u>Tianyi Yan</u>     | Signature <u>Tianyi Yan</u>     | Date <u>2019.3.21</u> |
| Name (3) <u>Zhongrong Miao</u> | Signature <u>Zhongrong Miao</u> | Date <u>2019.3.21</u> |
| Name (4) _____                 | Signature _____                 | Date _____            |
| Name (5) _____                 | Signature _____                 | Date _____            |
| Name (6) _____                 | Signature _____                 | Date _____            |
| Name (7) _____                 | Signature _____                 | Date _____            |
| Name (8) _____                 | Signature _____                 | Date _____            |
| Name (9) _____                 | Signature _____                 | Date _____            |
| Name (10) _____                | Signature _____                 | Date _____            |
| Name (11) _____                | Signature _____                 | Date _____            |
| Name (12) _____                | Signature _____                 | Date _____            |

Please scan and email to [stroke@strokeahajournal.org](mailto:stroke@strokeahajournal.org).
